# Supplementary material for: The Suppression of the Epithelial to Mesenchymal Transition in Prostate Cancer through the Targeting of MYO6 Using MiR-145-5p
Source: MDPI journal article supplement (doi:10.3390/ijms25084301), 2024-04-12
Supplement: s1 [file s1]

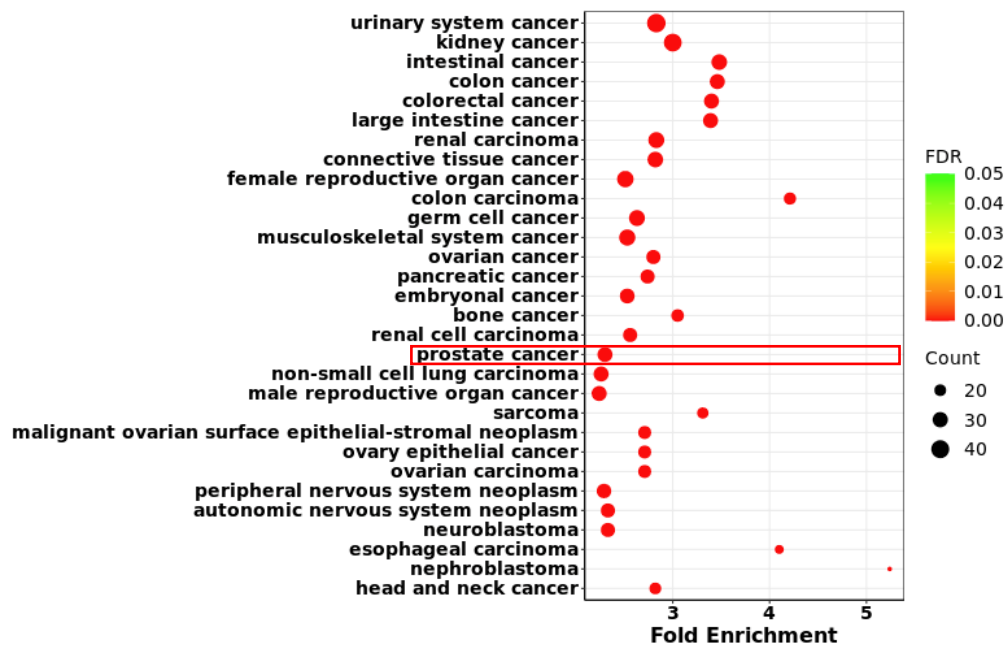

Figure S1. Bubble plot of Disease Ontology functional enrichment analysis of miR-145-5p targets. Targets of miR-145-5p significantly associated with prostate cancer.

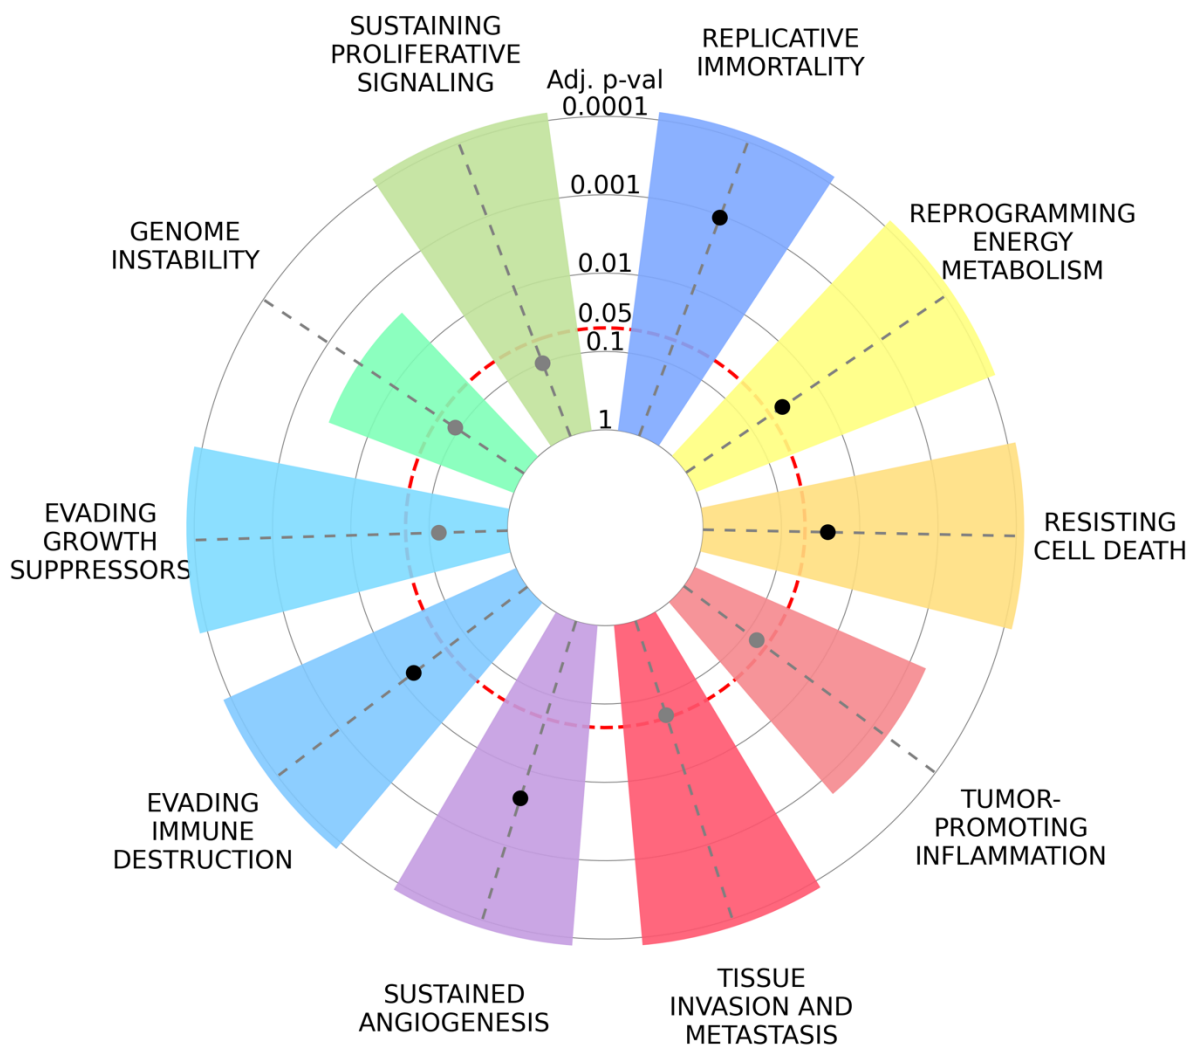

| Cancer Hallmark                | Overlap | <i>p</i> -value    | Adjusted <i>p</i> -value | Odds Ratio | Genes                                                                                                                                                                                                                                                                                                                           |
|--------------------------------|---------|--------------------|--------------------------|------------|---------------------------------------------------------------------------------------------------------------------------------------------------------------------------------------------------------------------------------------------------------------------------------------------------------------------------------|
| TISSUE INVASION AND METASTASIS | 56/2318 | $1 \times 10^{-6}$ | $1 \times 10^{-6}$       | 3.96       | MAP2K6;KLF4;CDH2;ITGB8;DDX17;MMP12;ROBO2;NRAS;PODXL;PXN;TGFB2;IRS1;MYC;NFATC1;SERPINE1;BRAF;PAK4;ARF6;PPP3CA;MYO6;POU5F1;CTNND1;SMAD3;MMP14;ILK;SMAD2;MMP1;COL5A1;ESR1;CD44;VEGFA;NEDD9;SOX9;CDK4;TGFB2;HMGA2;EGFR;IGF1R;STAT1;MDM2;CDKN1A;NANOG;IRS2;SP1;ETS1;RPS6KB1;ROCK1;ADAM17;ANGPT2;CBFB;FSCN1;EPAS1;F11R;CD28;CD40;YES1 |

**Figure S2. Enrichment analysis of miR-145-5p validated targets using integrated cancer hallmark gene set ( $n = 6763$ ).** Highlighted analysis shows significant association with tissue invasion and metastasis. Other significant hallmarks are tumour promoting inflammation, resisting cell death, reprogramming energy metabolism, replicative immortality, sustaining proliferative signalling, genome instability, evading growth suppressors, evading immune destruction and sustained angiogenesis. Generated using CancerHallmarks tool (<https://cancerhallmarks.com/>).

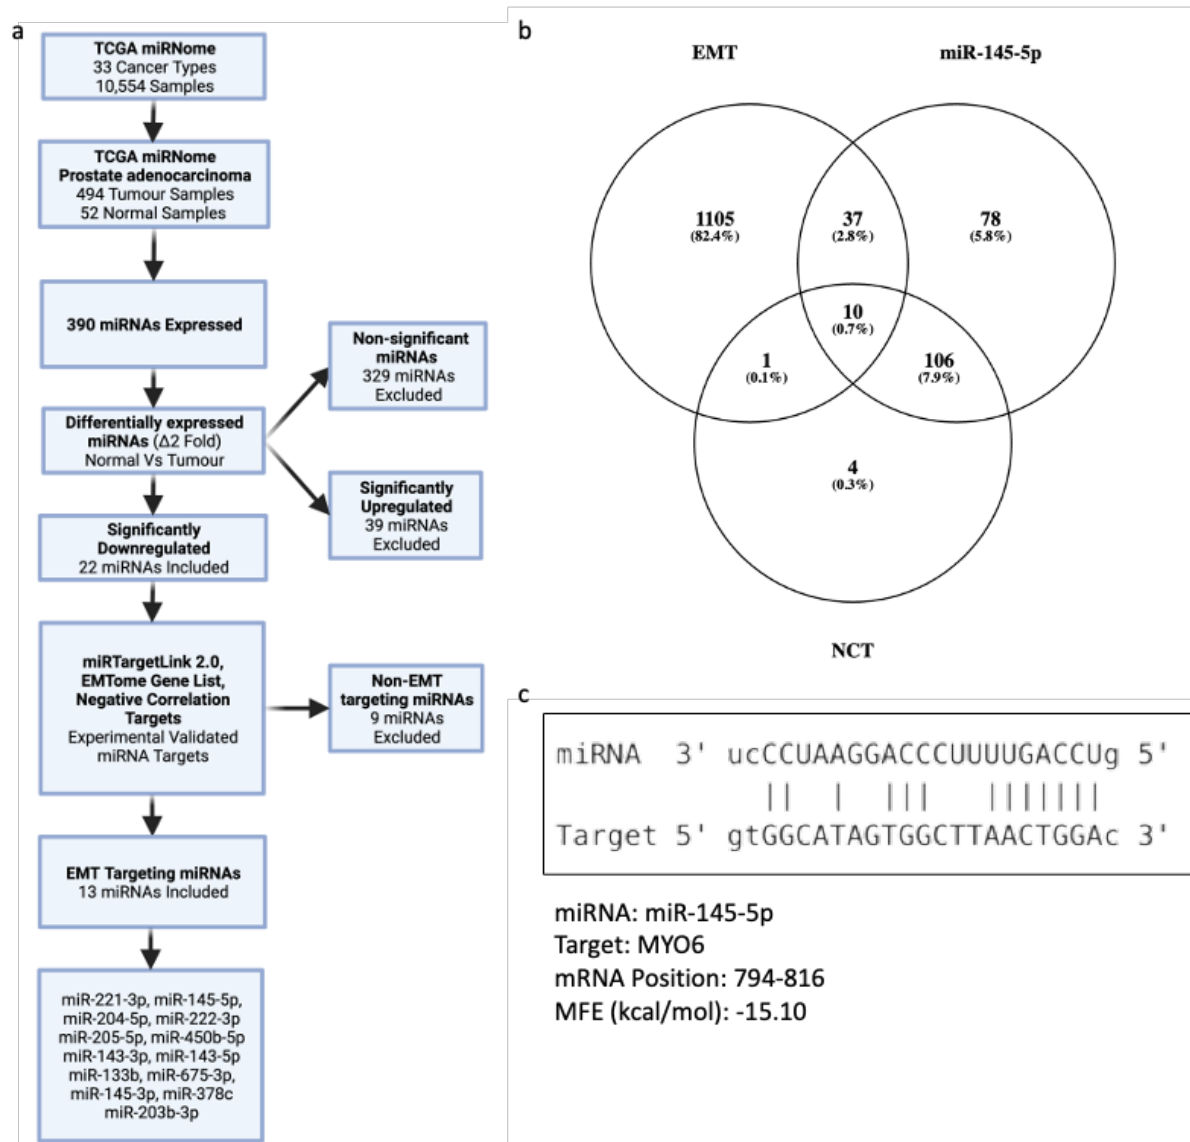

**Figure S3. In silico selection of downregulated miRNAs in prostate cancer associated with EMT.** (a) Selection process for identifying EMT associated miRNAs in prostate cancer. (b) Targets of the significantly downregulated miR-145-5p were predicted using miRTargetLink 2.0. Targets were cross-referenced to EMTome gene list and negative correlation targets in prostate cancer. (c) miR-TarBase computational prediction of miR-145-5p-MYO6 interaction. **EMT** = epithelial-to-mesenchymal transition; **NTC** = Negative Correlation Targets.

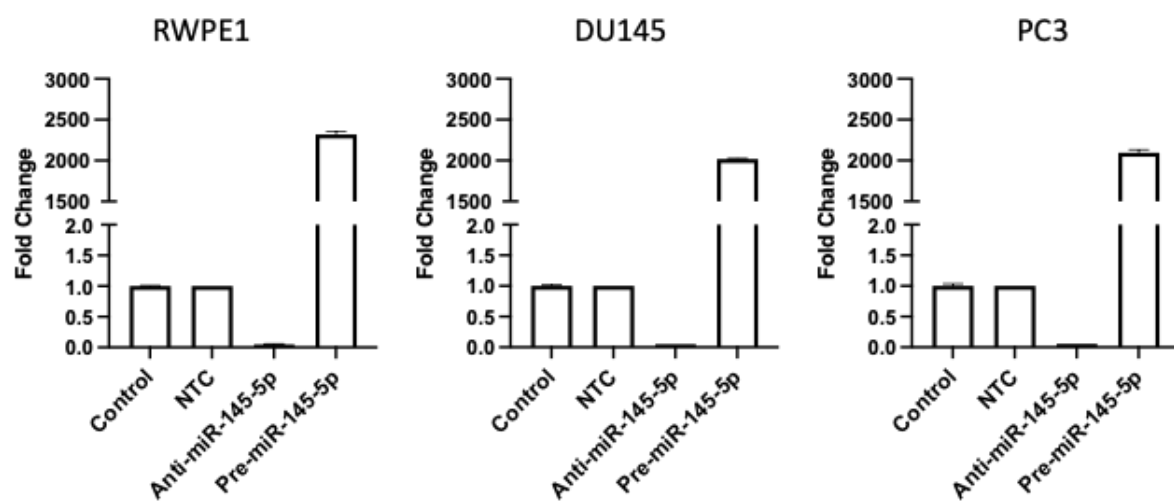

Figure S4. Confirmation of miR-145-5p overexpression and inhibition in prostate cell lines. ( $n = 3$ , housekeeping: snRNA U6).

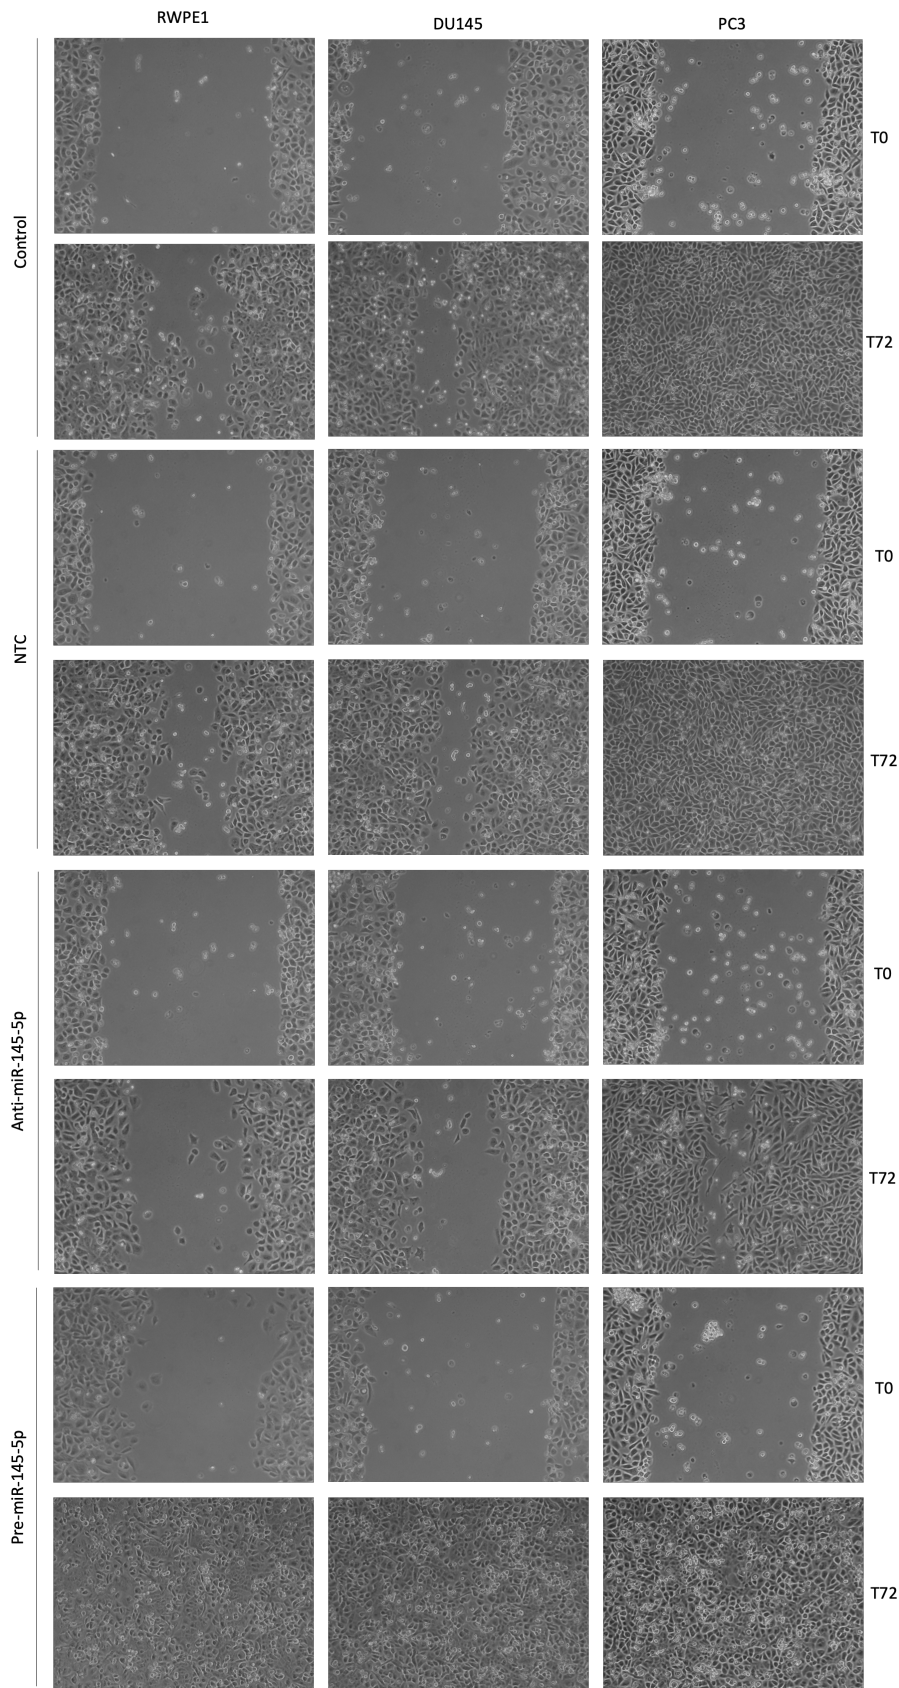

**Figure S5. Representative images of wound-healing assay.** miR-145-5p controls migratory capacity of RWPE1, DU145 and PC3 cell lines. Scratch assay performed at 72 hours post transfection using ImageJ software to quantify wound closure %. Pre-miR-Neg, Anti-miR-145-5p, Pre-miR-145-5p (25 nM). NTC = Non-targeting Control.

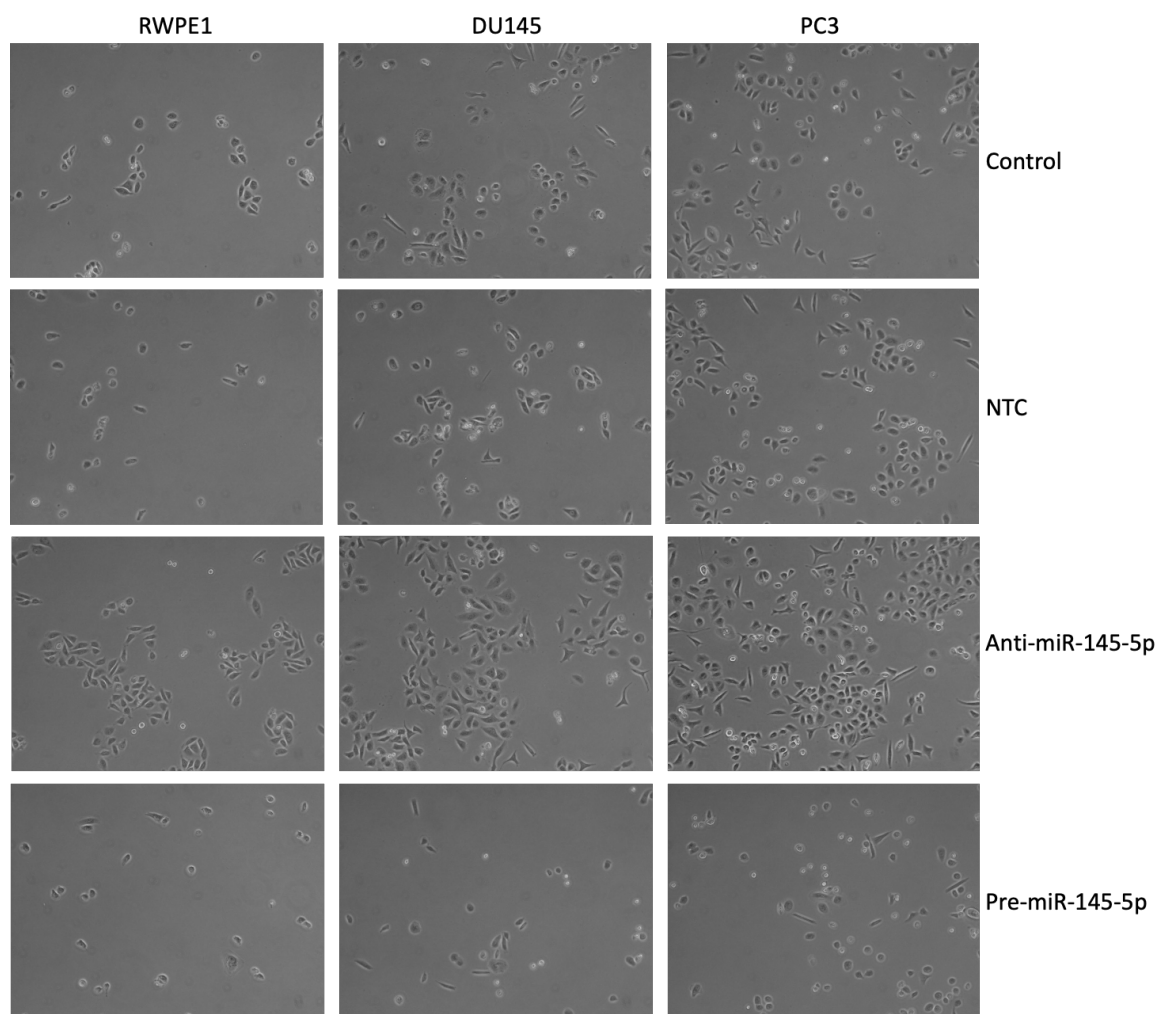

**Figure S6. Representative images of clonogenicity assay.** miR-145-5p alters colony forming capacity of RWPE1, DU145 and PC3 cell lines. Cell count performed using ImageJ software at 72 hours post transfection. Pre-miR-Neg, Anti-miR-145-5p, Pre-miR-145-5p (25 nM).

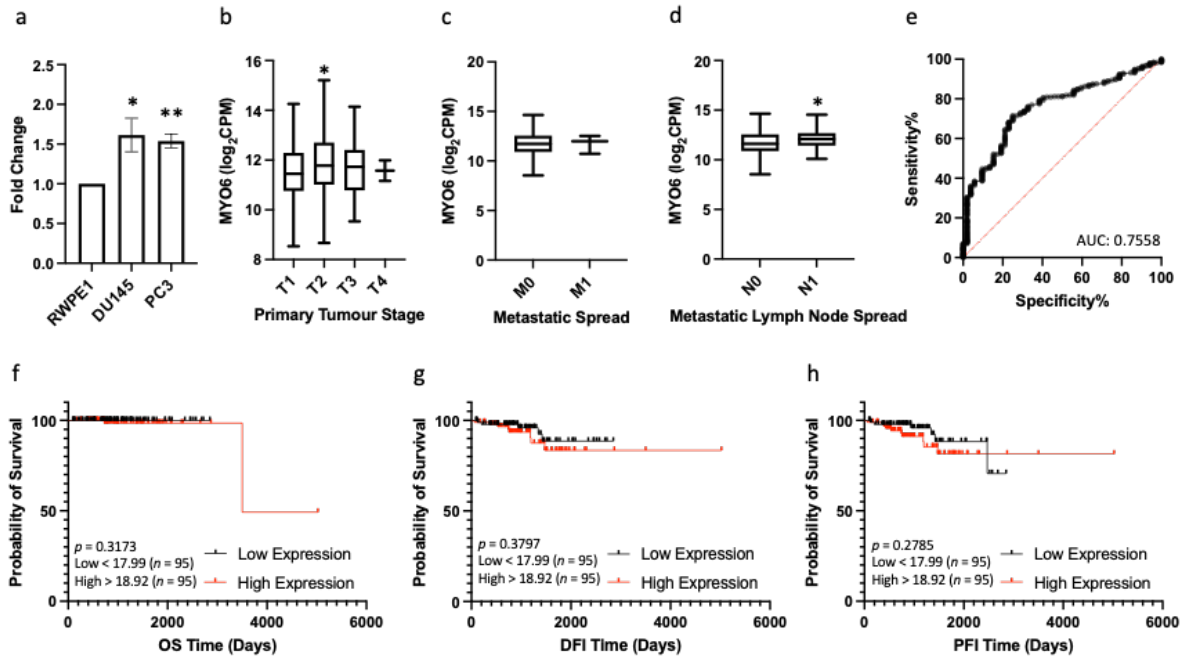

**Figure S7. MYO6 upregulation is associated with prostate cancer and disease progression.** (a) qRT-PCR shows MYO6 expression is significantly higher in DU145 and PC3 prostate cancer cell lines compared to normal prostate cell line, RWPE1 ( $n = 3$ , housekeeping: GAPDH). (b) pathological stage T2 ( $n = 292$ ) compared to T1 ( $n = 197$ ). (c) No significant difference in pathological stage M1 ( $n = 3$ ) compared to M0 ( $n = 542$ ) and (d) MYO6 is significant higher in pathological stage N1 ( $n = 80$ ) compared to N0 ( $n = 385$ ). (e) ROC curve analysis demonstrating that MYO6 shows potential for distinguishing between tumor and normal tissue in TCGA PRAD patient cohort. For KM plots, patients were divided into quartiles based on MYO6 expression for (f) Overall survival, (g) Disease-free interval and (h) Progression-free interval. (All log-rank (Mantel-Cox) test. All other  $p$ -values generated by unpaired two-tailed  $t$ -test (\* $p < 0.05$ , \*\* $p < 0.01$ ). CPM = Copies per million;  $n$  = number.

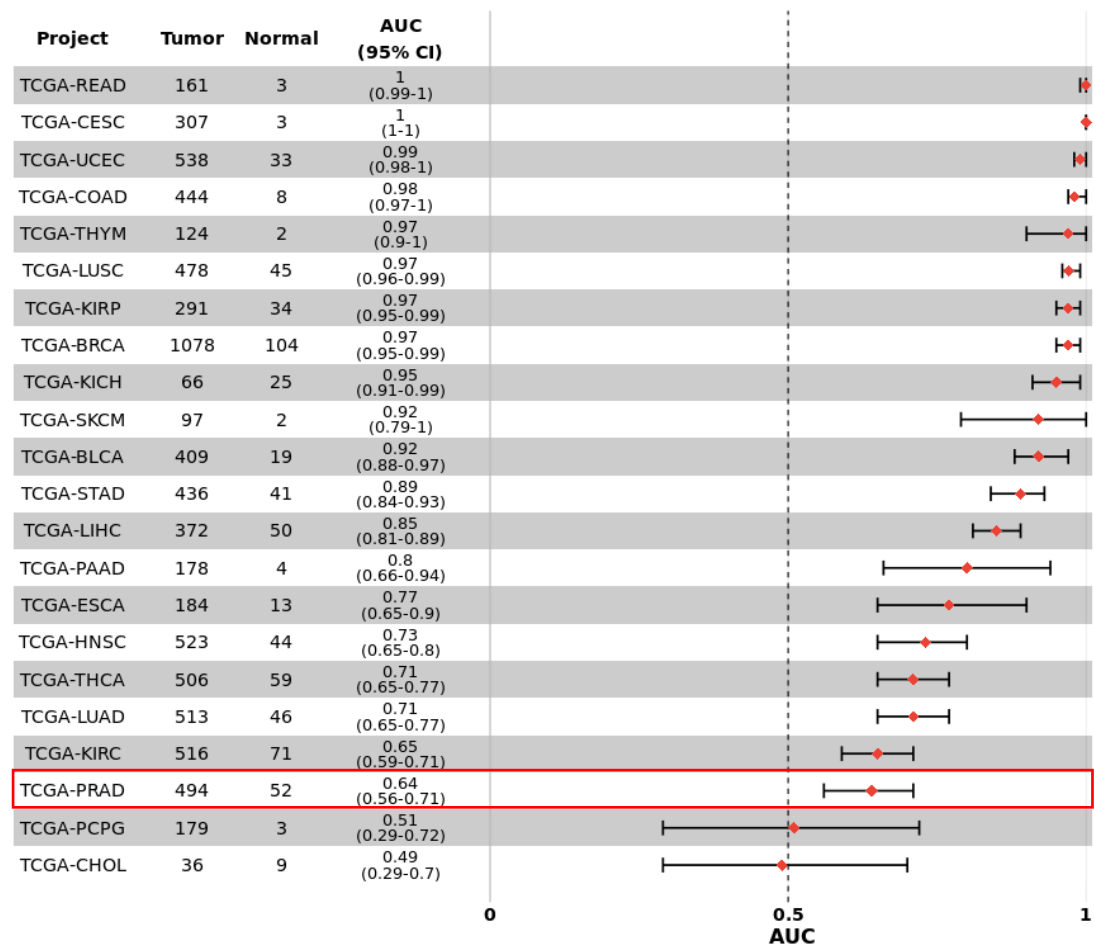

**Figure S8. CancerMIRNome TCGA Pan-Cancer ranked forest plots of miR-145-5p ROC analysis** shows miR-145-5p has significant diagnostic value in multiple cancer types. Result for prostate cancer is enclosed in the red box (TCGA-PRAD).



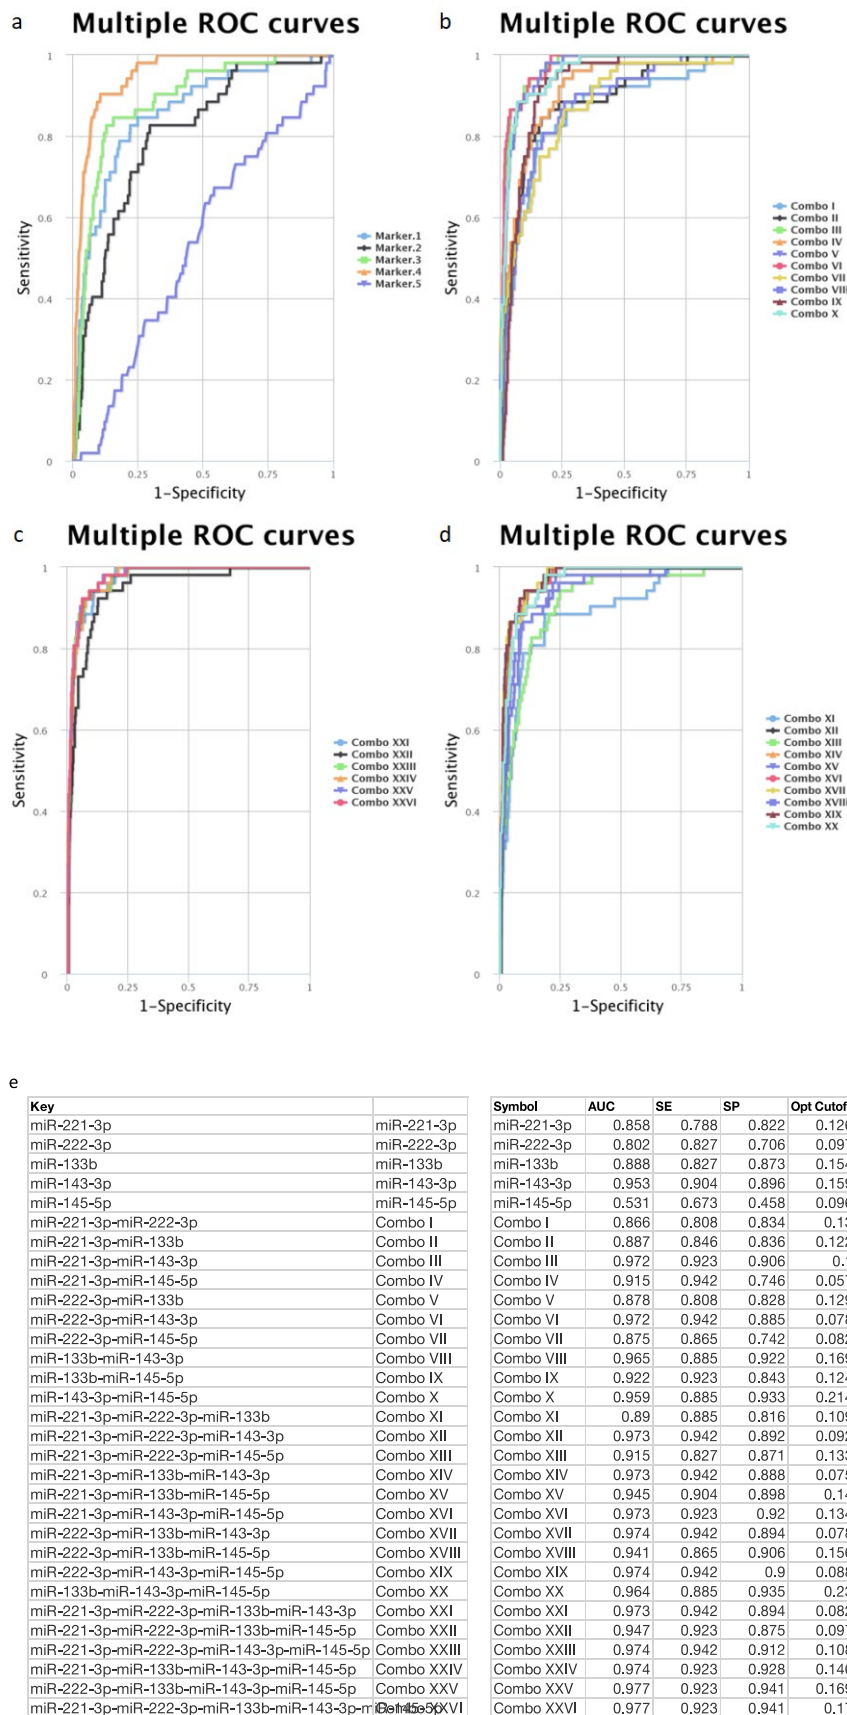

**Figure S9. CombiROC analysis of a miRNA biomarker panel for prostate cancer detection. A**

combination panel of 5 miRNAs (miR-221-3p, miR-222-3p, miR-133b, miR-143-3p, and miR-145-5p) was evaluated for its ability to distinguish prostate cancer ( $n = 436$ ) from normal controls ( $n = 48$ ). (a) ROC curves for each individual miRNA (b-d) CombiROC curve for multiple combination panels, showing improved AUC compared to individual biomarkers. (e) Table displaying the contribution of each miRNA to the overall performance of the biomarker panel. The combination miRNA panel shows discriminatory power for detecting prostate cancer (AUC = 0.977).

**Table S1. KM plotter meta-analysis results of overall survival in various cancers comparing high/low expression of MYO6 and miR-145-5p.** Only cancers for which log-rank  $p < 0.05$  are presented. HR estimated for high compared to low expression (Cox proportional analysis, auto-selected cut-off).

|            | <i>Cancer</i>                         | <i>n</i> | <i>HR*</i> | <i>Log-rank p-value</i> |
|------------|---------------------------------------|----------|------------|-------------------------|
| MYO6       | Bladder Carcinoma                     | 405      | 0.69       | 0.044                   |
|            | Oesophageal Adenocarcinoma            | 80       | 2.41       | 0.0069                  |
|            | Head-neck squamous cell carcinoma     | 500      | 0.71       | 0.027                   |
|            | Kidney renal clear cell carcinoma     | 530      | 0.4        | 0.000000009             |
|            | Kidney renal papillary cell carcinoma | 288      | 0.39       | 0.0062                  |
|            | Liver hepatocellular carcinoma        | 371      | 1.68       | 0.0034                  |
|            | Lung adenocarcinoma                   | 513      | 0.53       | 0.00028                 |
|            | Ovarian cancer                        | 374      | 0.74       | 0.027                   |
|            | Pancreatic ductal adenocarcinoma      | 177      | 1.45       | 0.078                   |
|            | Rectum adenocarcinoma                 | 165      | 0.39       | 0.013                   |
|            | Thymoma                               | 119      | 6.44       | 0.0078                  |
| miR-145-5p | Bladder Carcinoma                     | 409      | 1.66       | 0.00085                 |
|            | Cervical squamous cell carcinoma      | 307      | 0.47       | 0.0059                  |
|            | Oesophageal Squamous Cell Carcinoma   | 89       | 3.32       | 0.008                   |
|            | Kidney renal clear cell carcinoma     | 516      | 0.65       | 0.017                   |
|            | Kidney renal papillary cell carcinoma | 291      | 3.23       | 0.00004                 |
|            | Liver hepatocellular carcinoma        | 372      | 0.64       | 0.019                   |
|            | Lung adenocarcinoma                   | 513      | 0.71       | 0.02                    |
|            | Stomach adenocarcinoma                | 436      | 1.79       | 0.0014                  |
|            | Thymoma                               | 124      | 0.12       | 0.0016                  |

\* Red text indicates HR > 1; high expression of miR-145-5p or MYO6 predicted poor prognosis; blue text indicates HR < 1; low expression of miR-145-5p or MYO6 predicted favourable prognosis.  $n$  = number; HR = Hazard ratio; KM = Kaplan-Meier
